# Supplementary material for: Comparative analyses define differences between BHD-associated renal tumour and sporadic chromophobe renal cell carcinoma
Source: PubMed Central journal article supplement (PMC10200853; doi:10.1016/j.ebiom.2023.104596), 2023-05-12

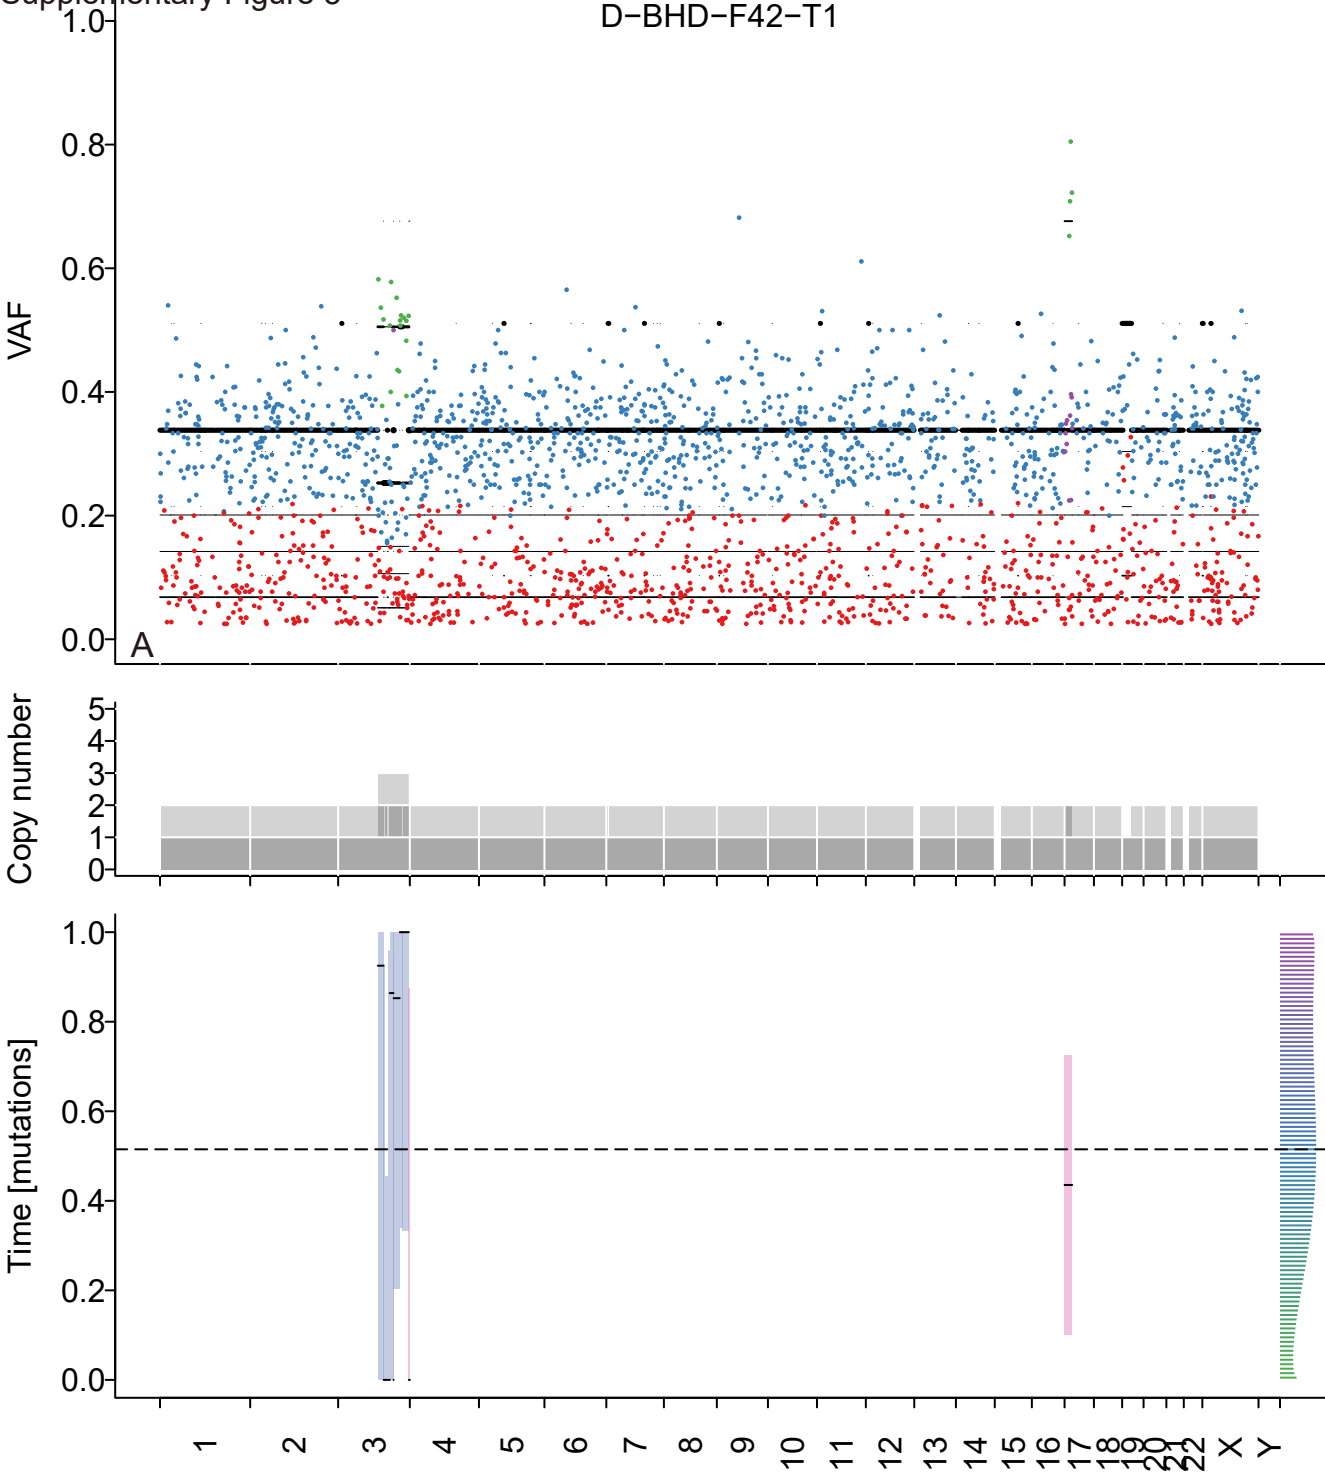

# D-BHD-F42-T2

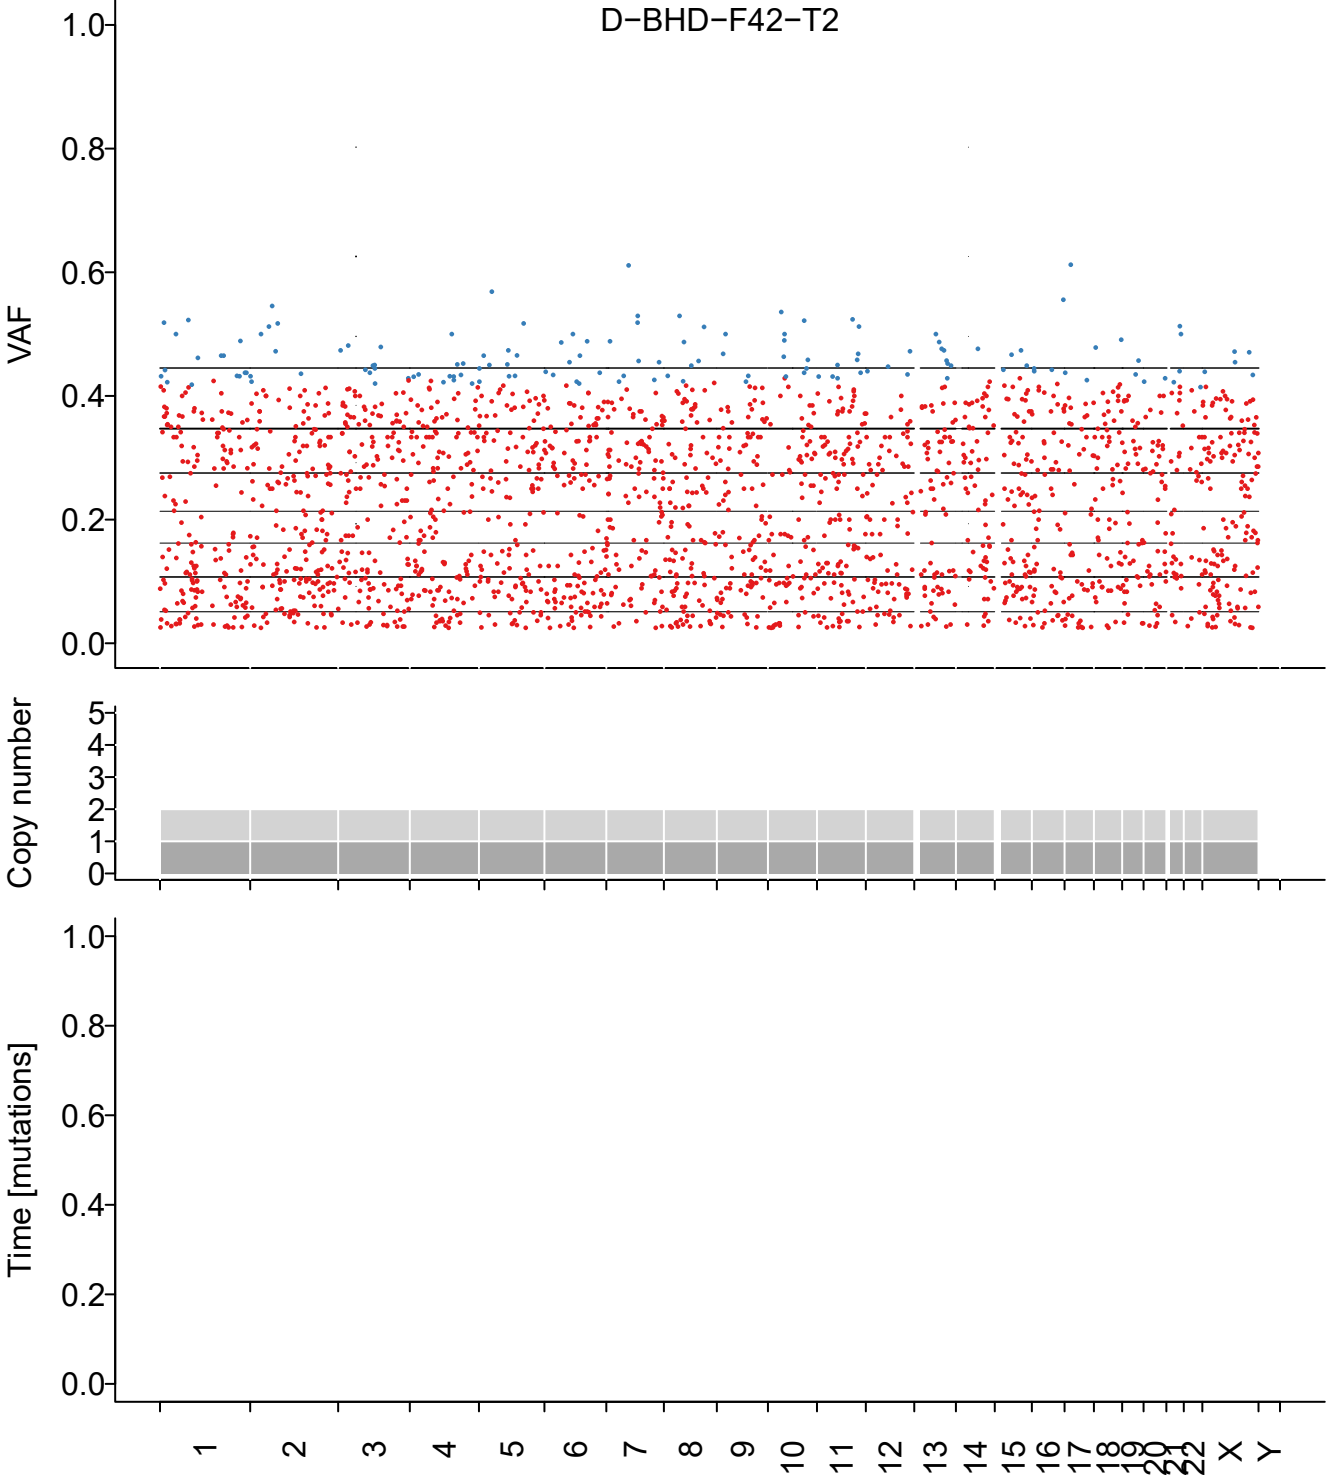

# D-BHD-F42-T3

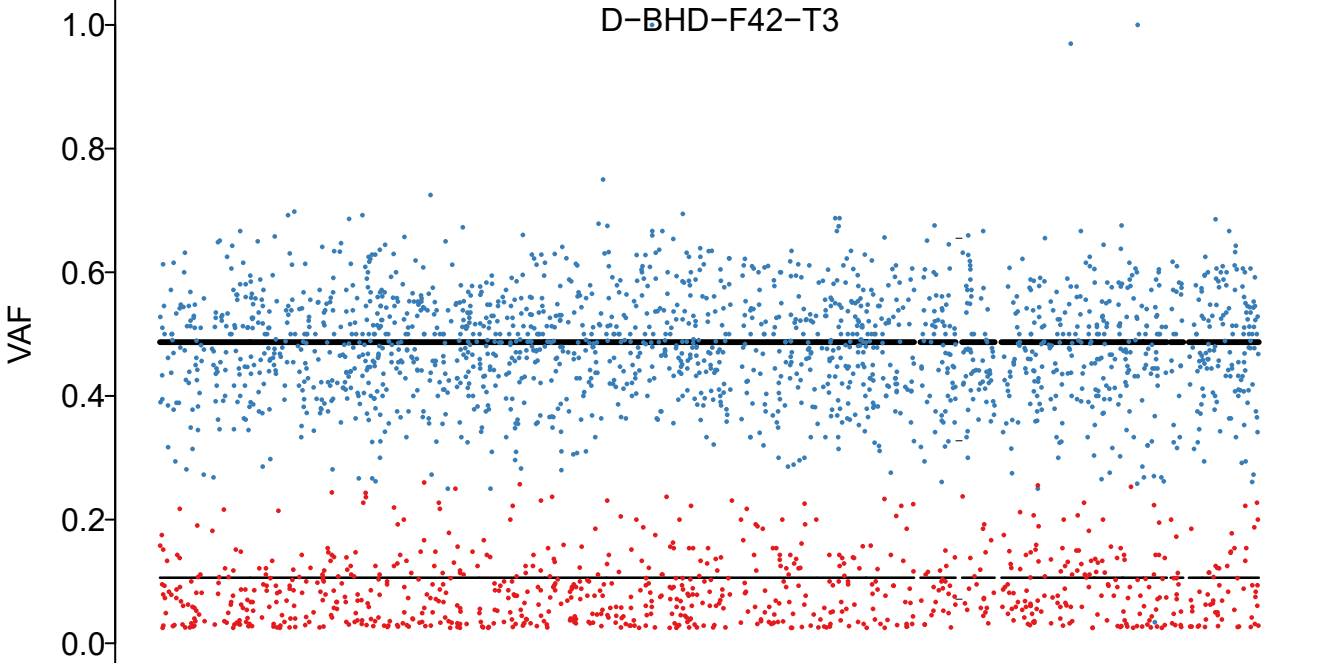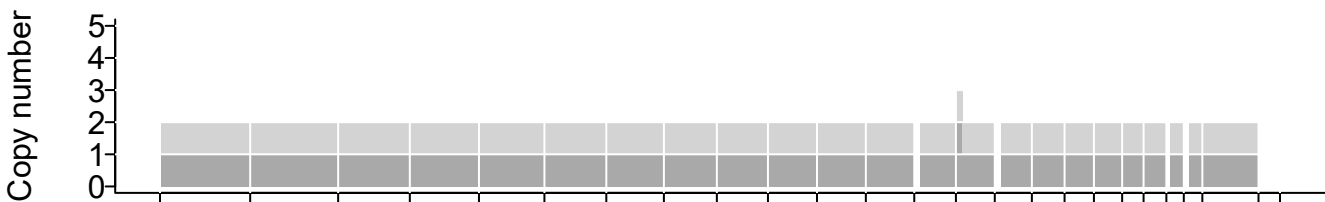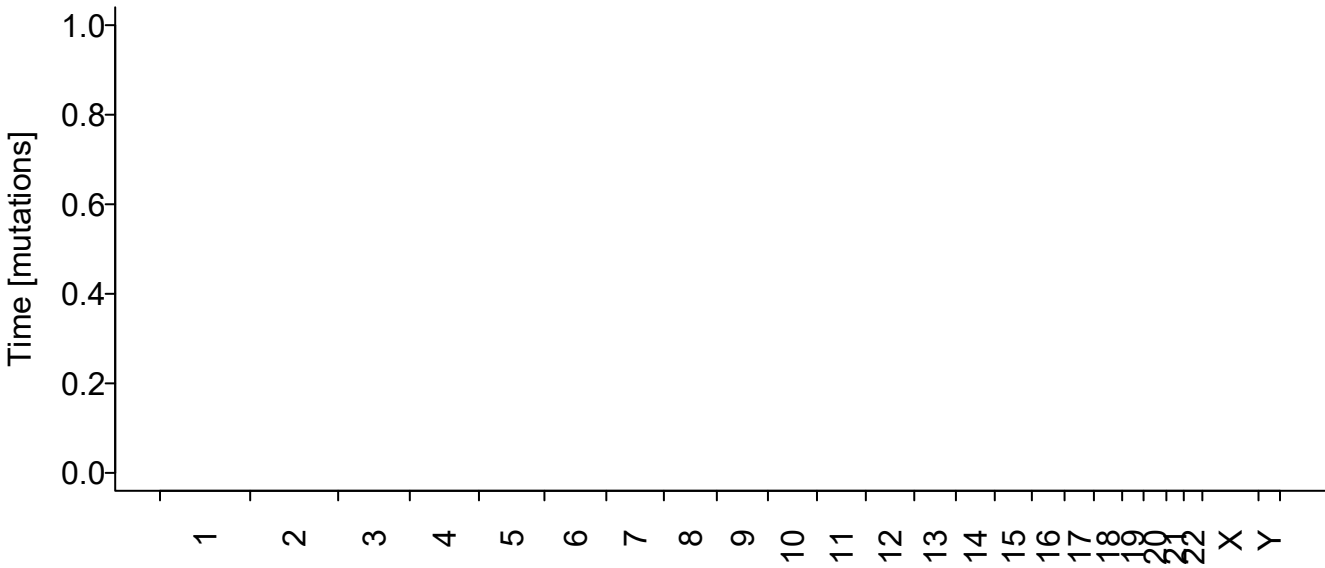

# D-BHD-F43-T1

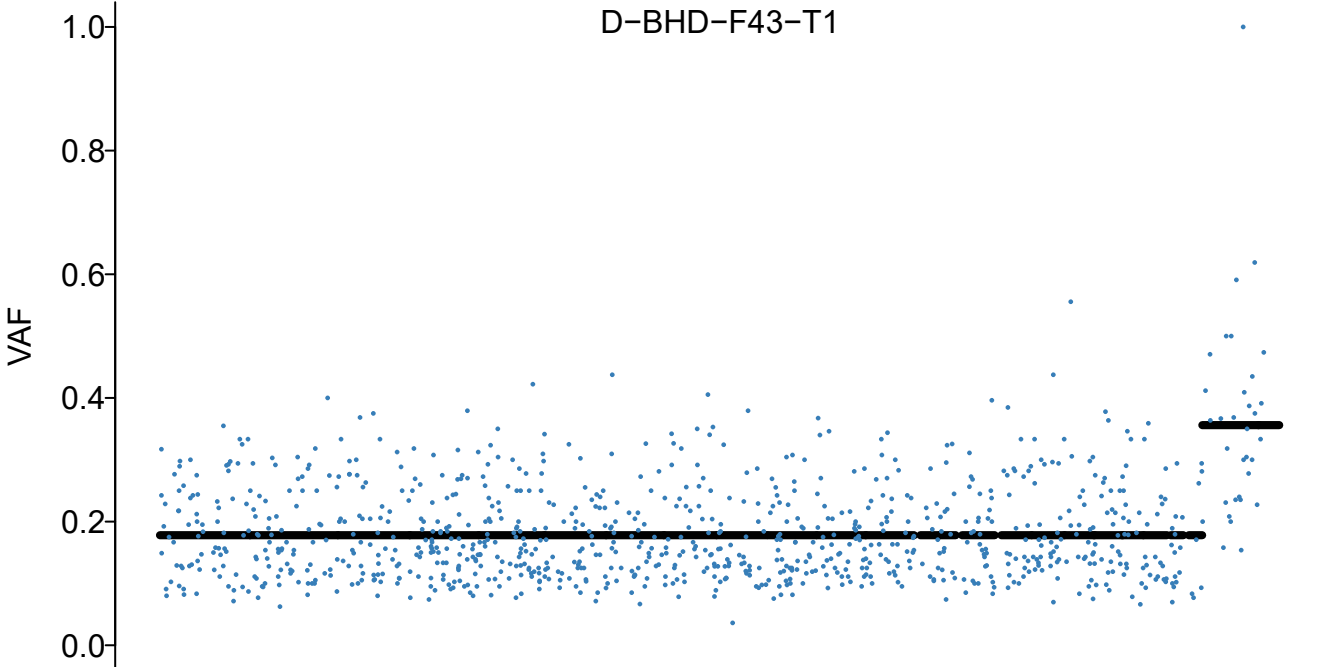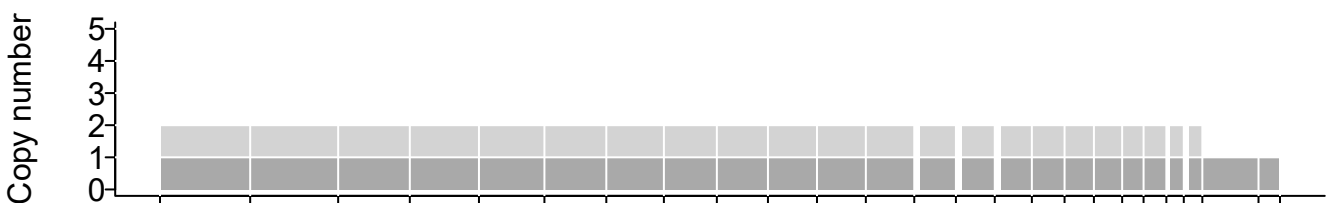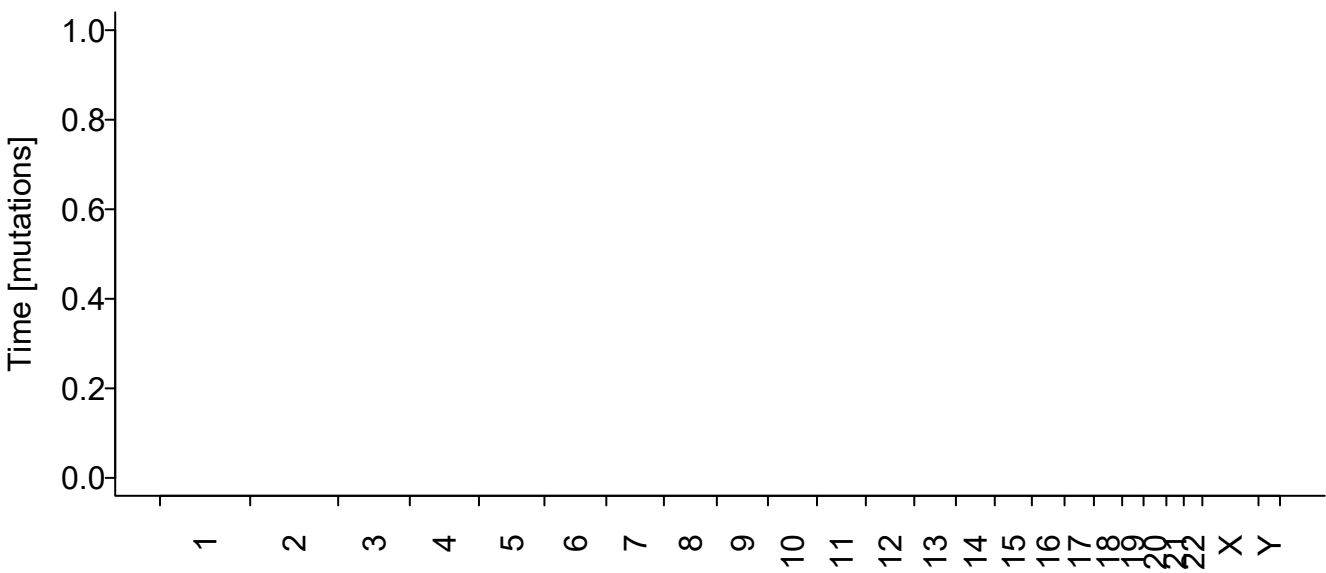

# D-BHD-F59-T1

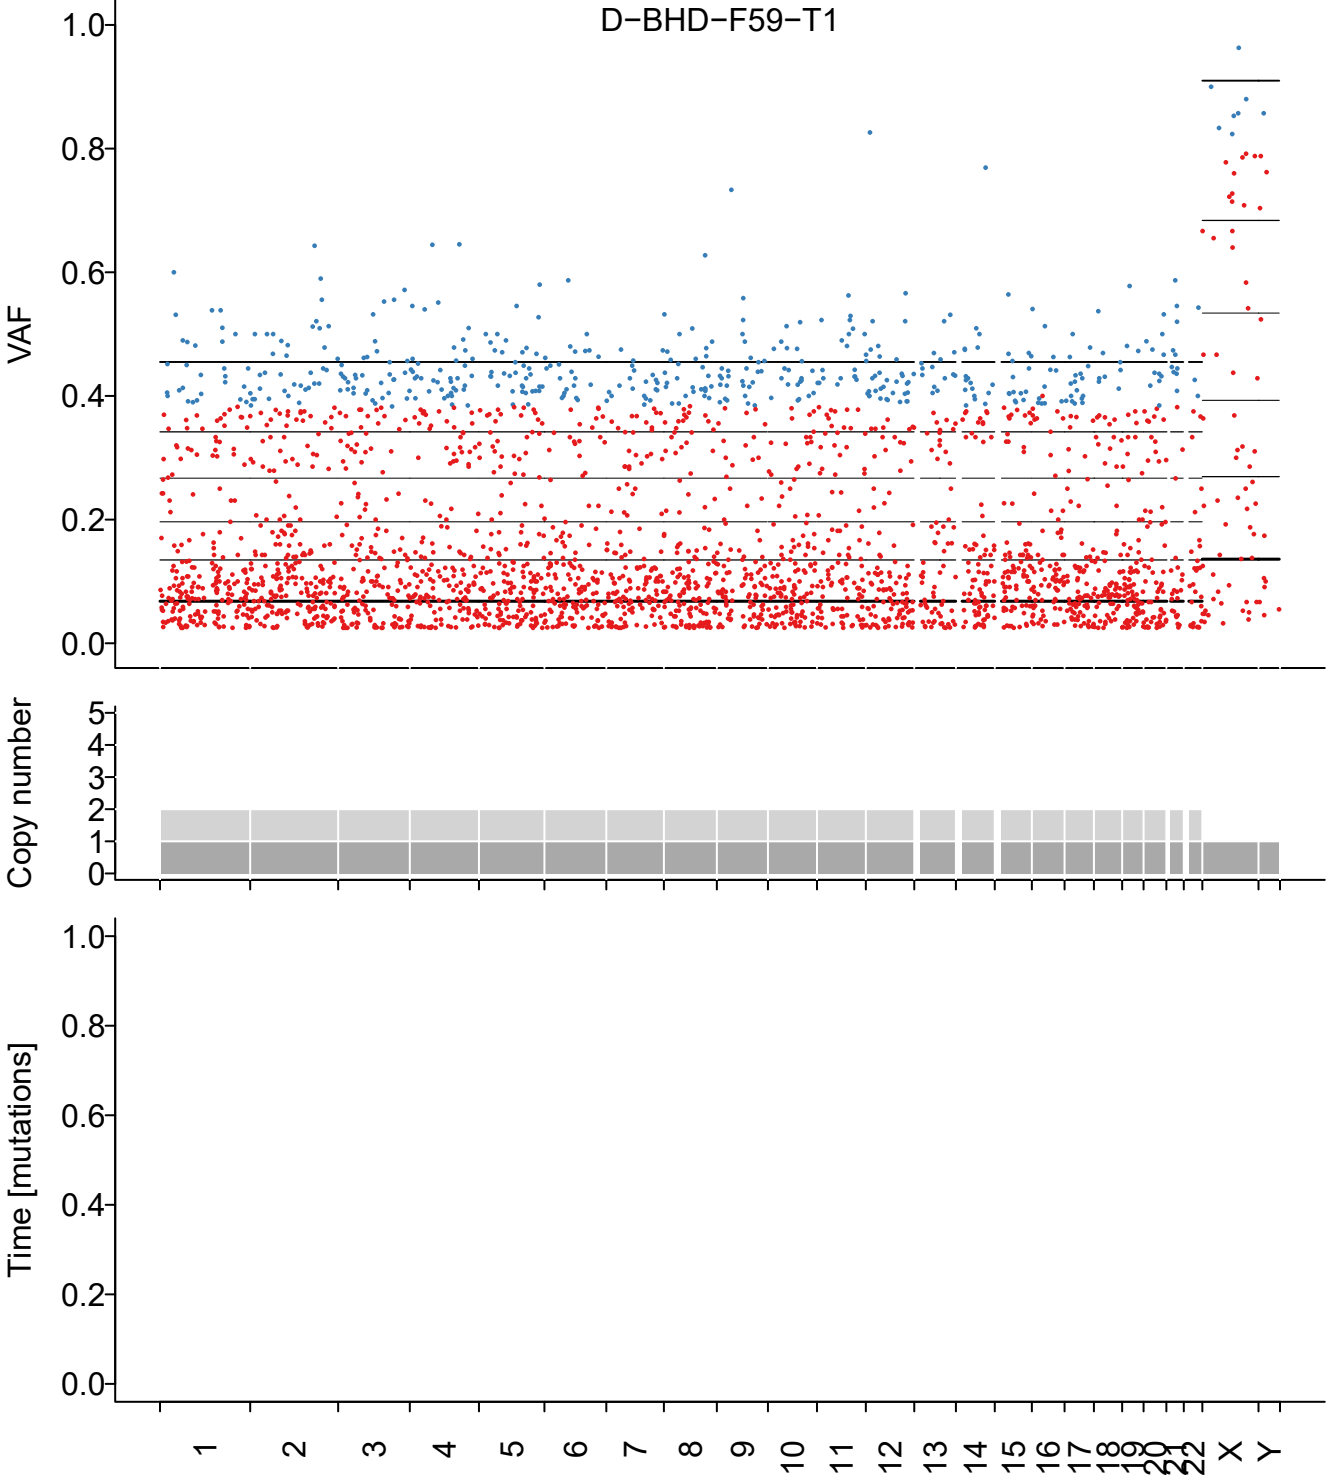

D-BHD-F59-T11

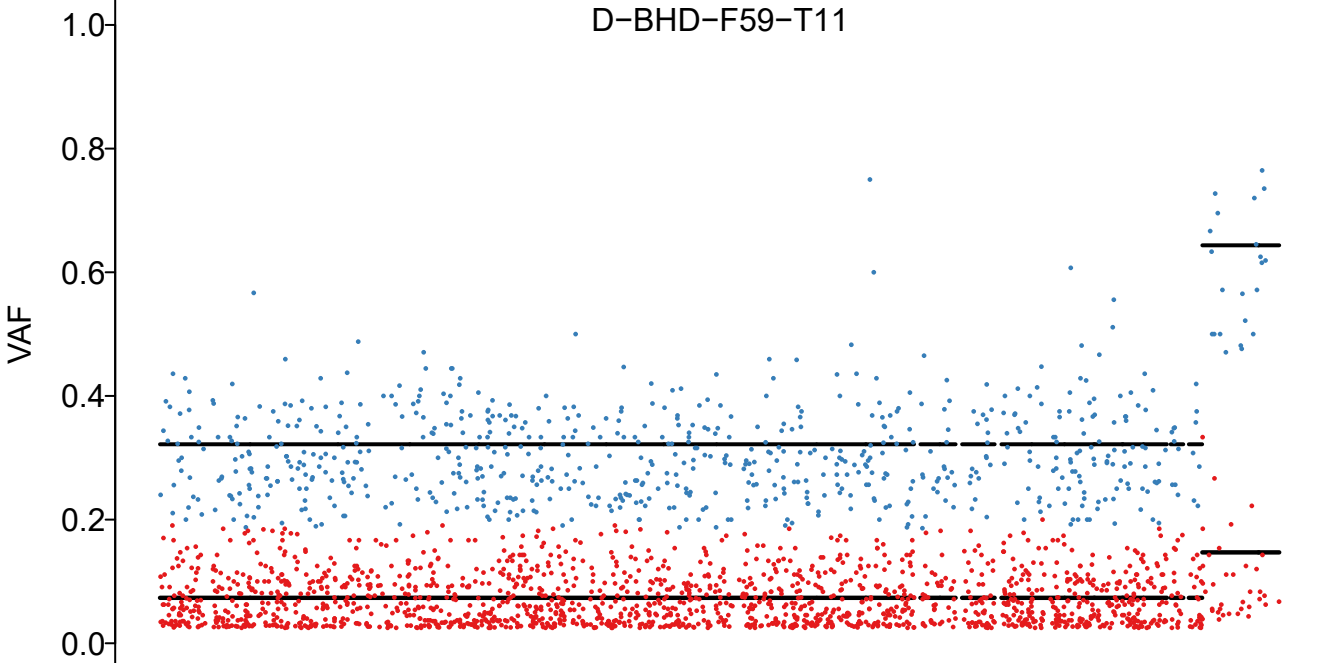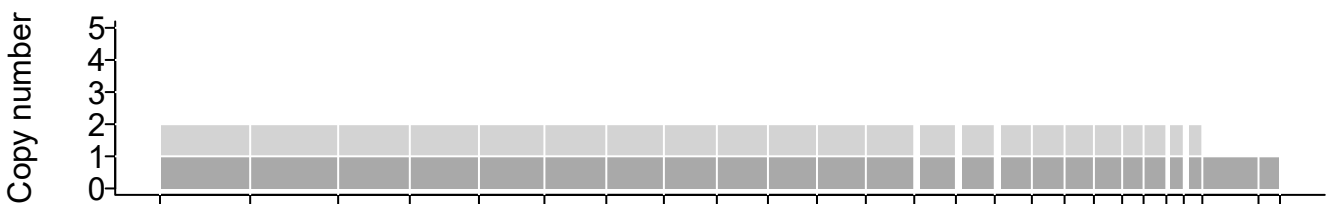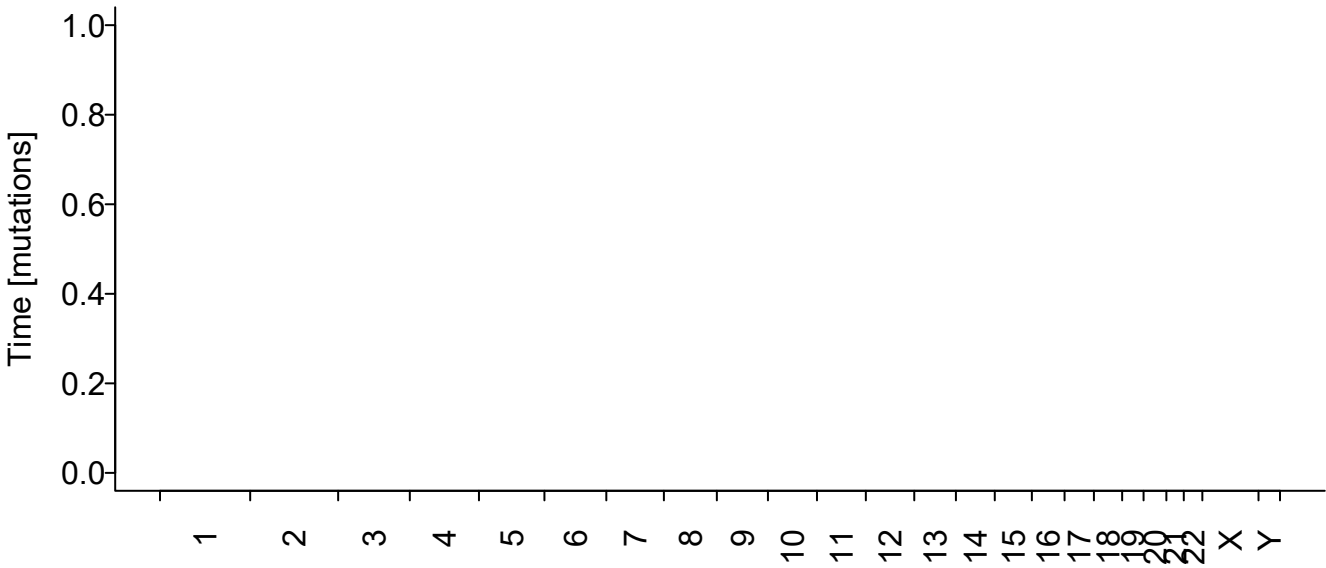

# D-BHD-F59-T12

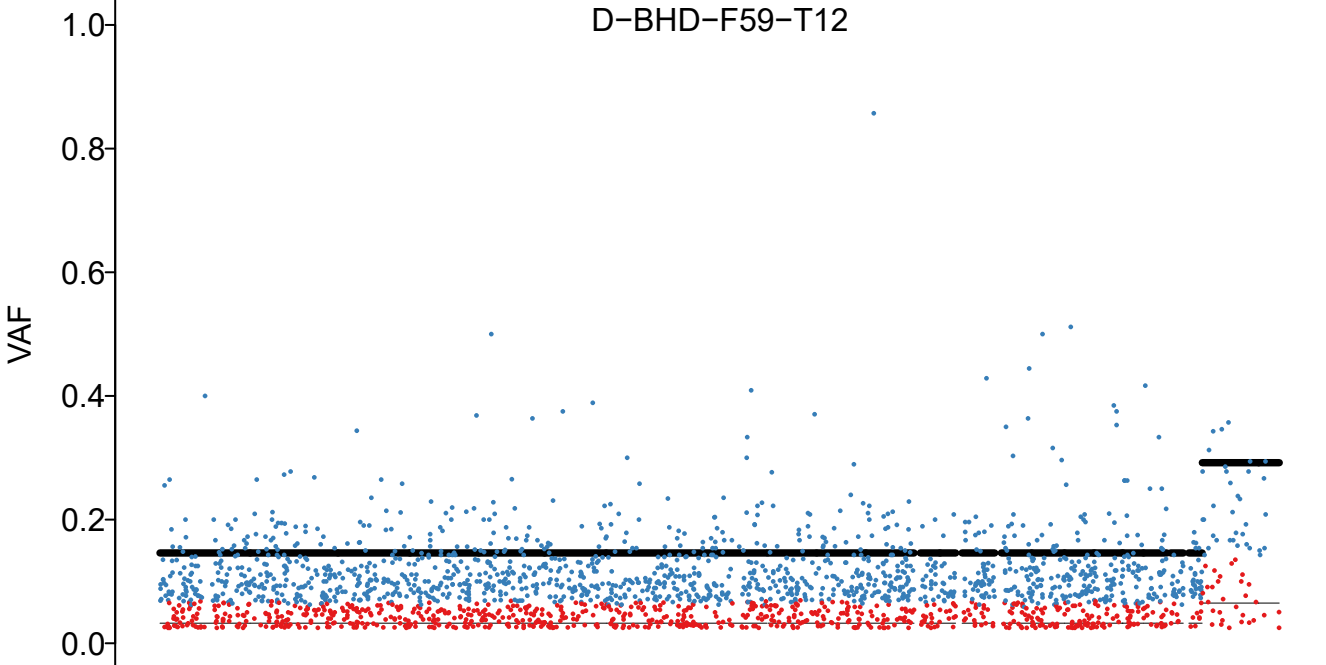

# D-BHD-F59-T2

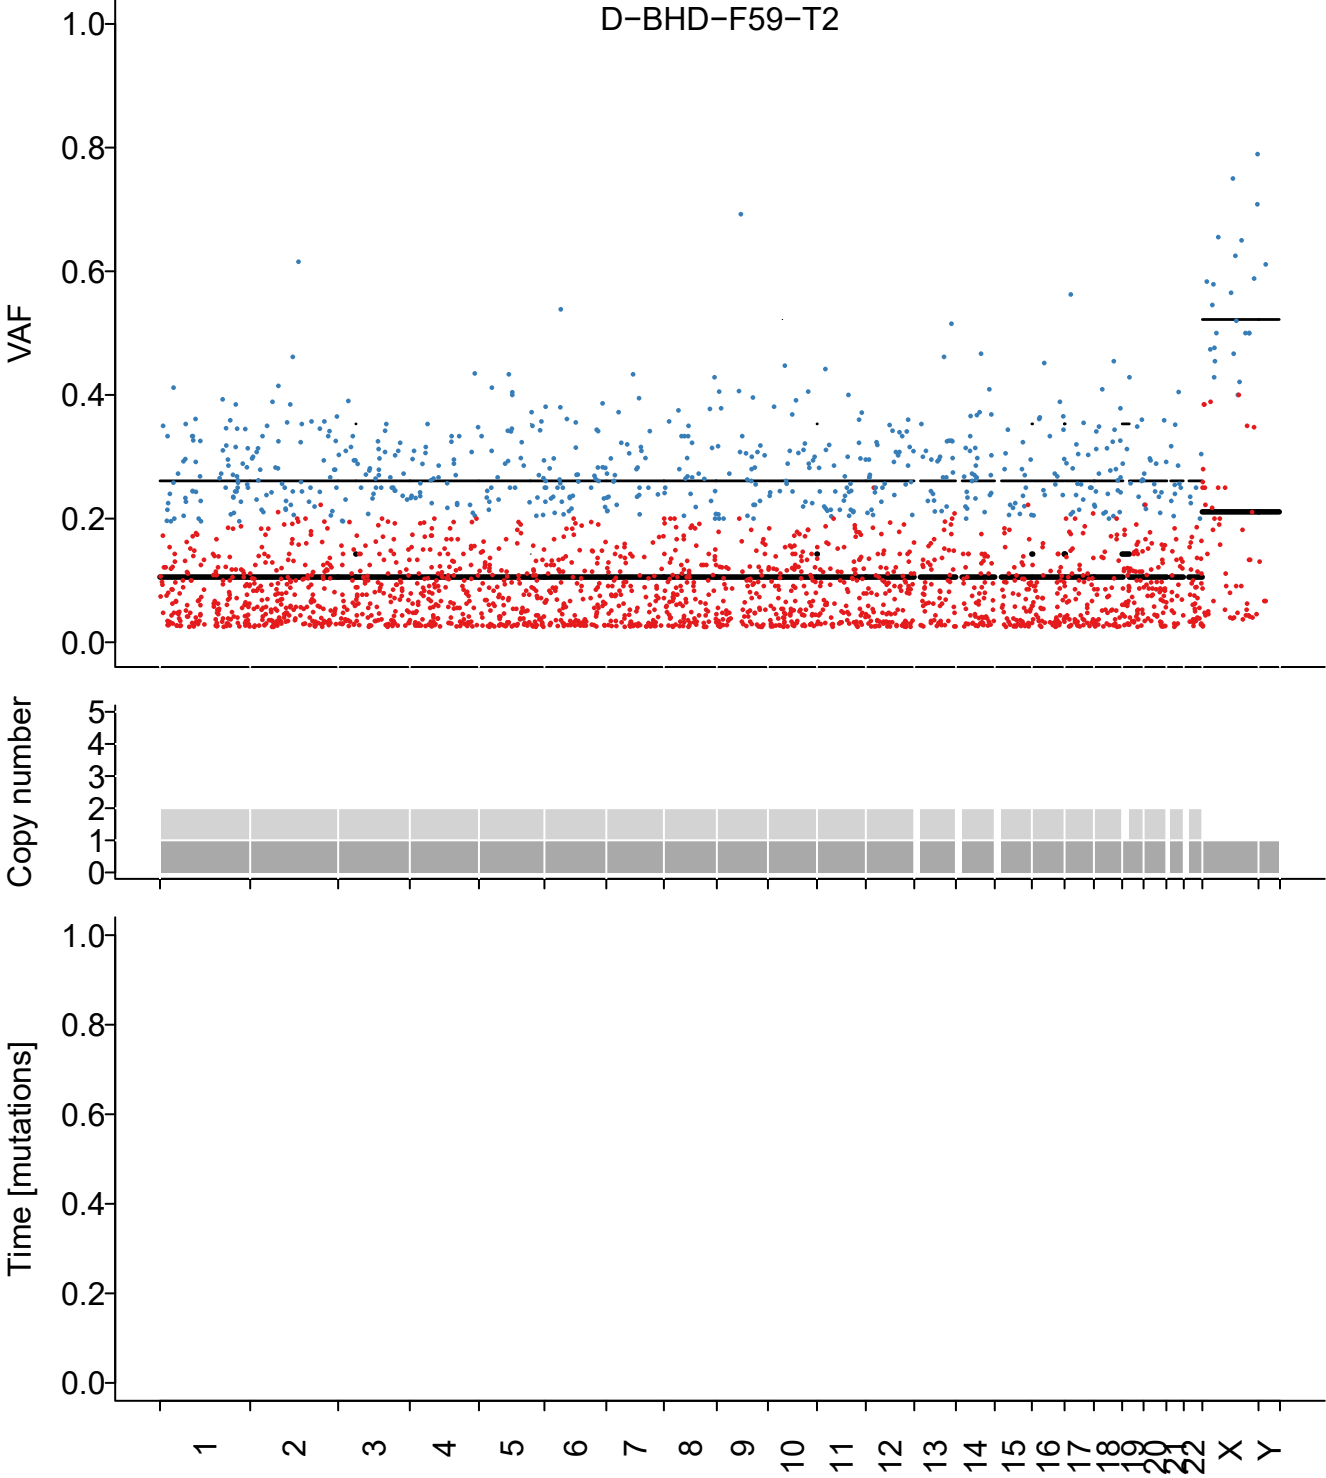



# D-BHD-F59-T8

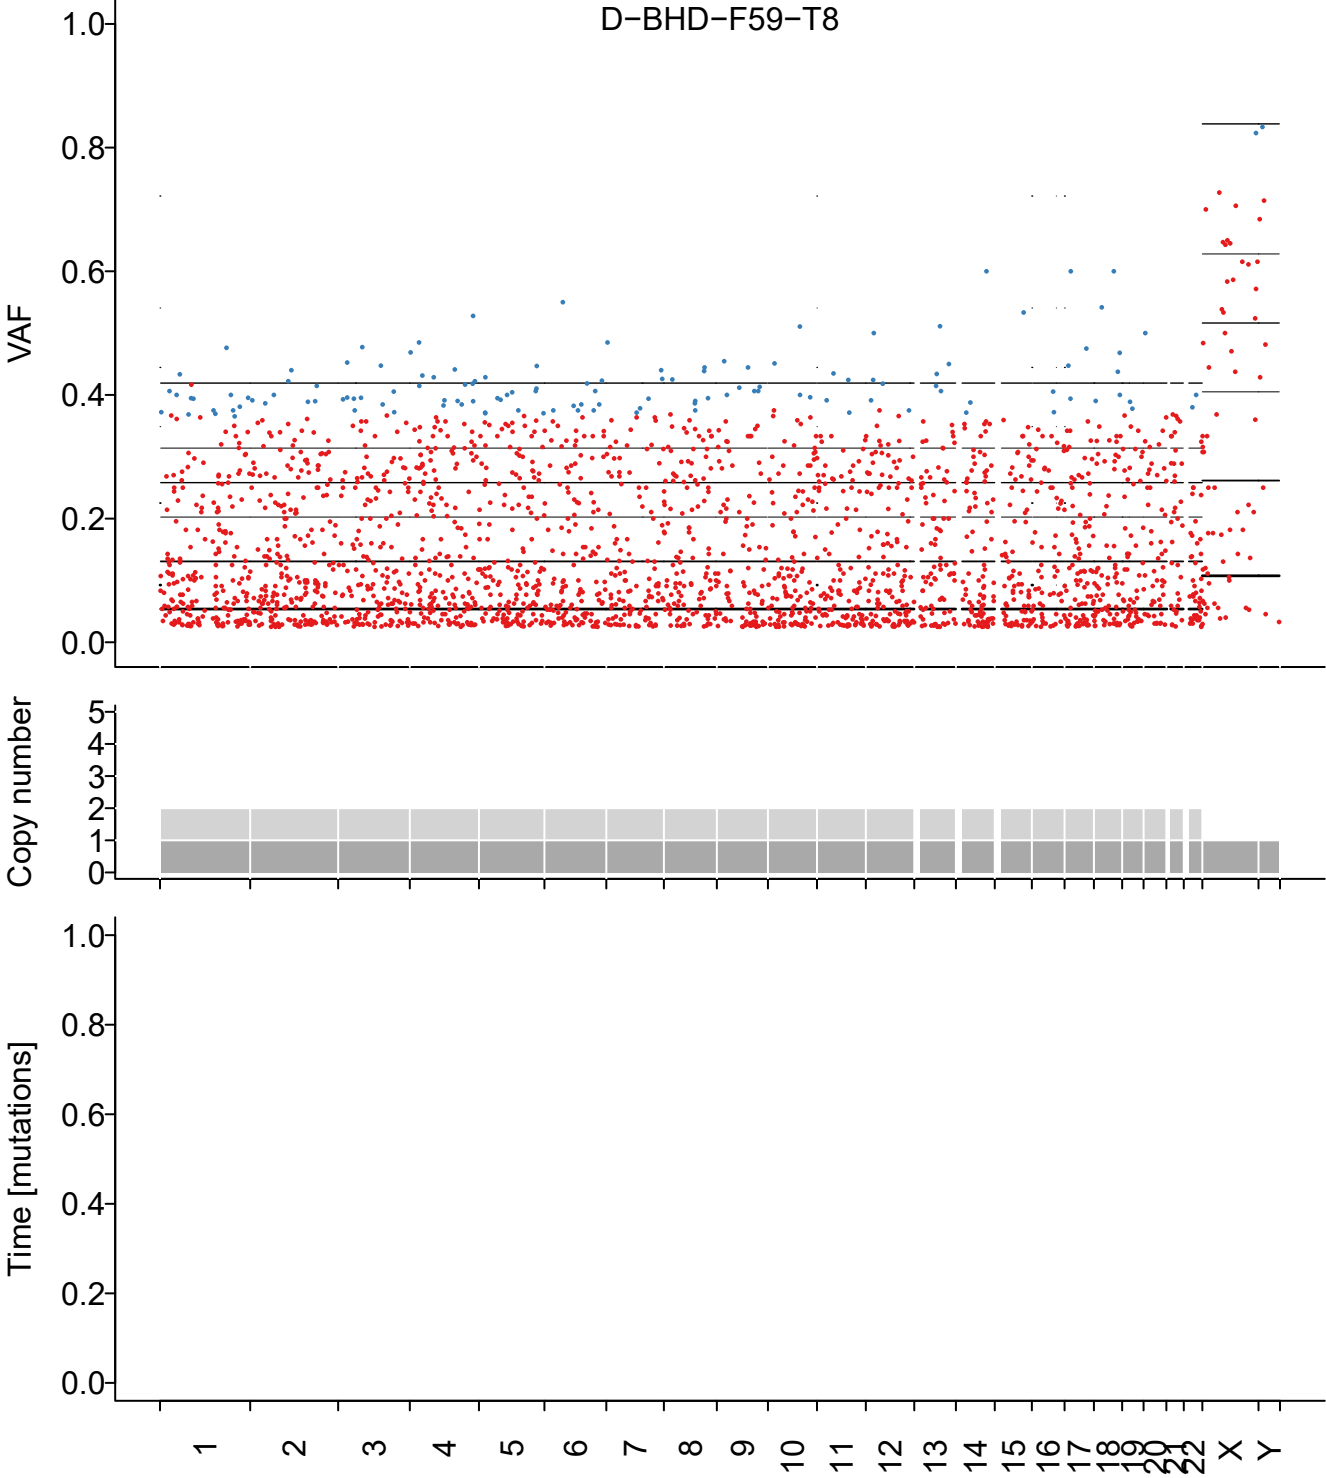

## D-BHD-F107-T1

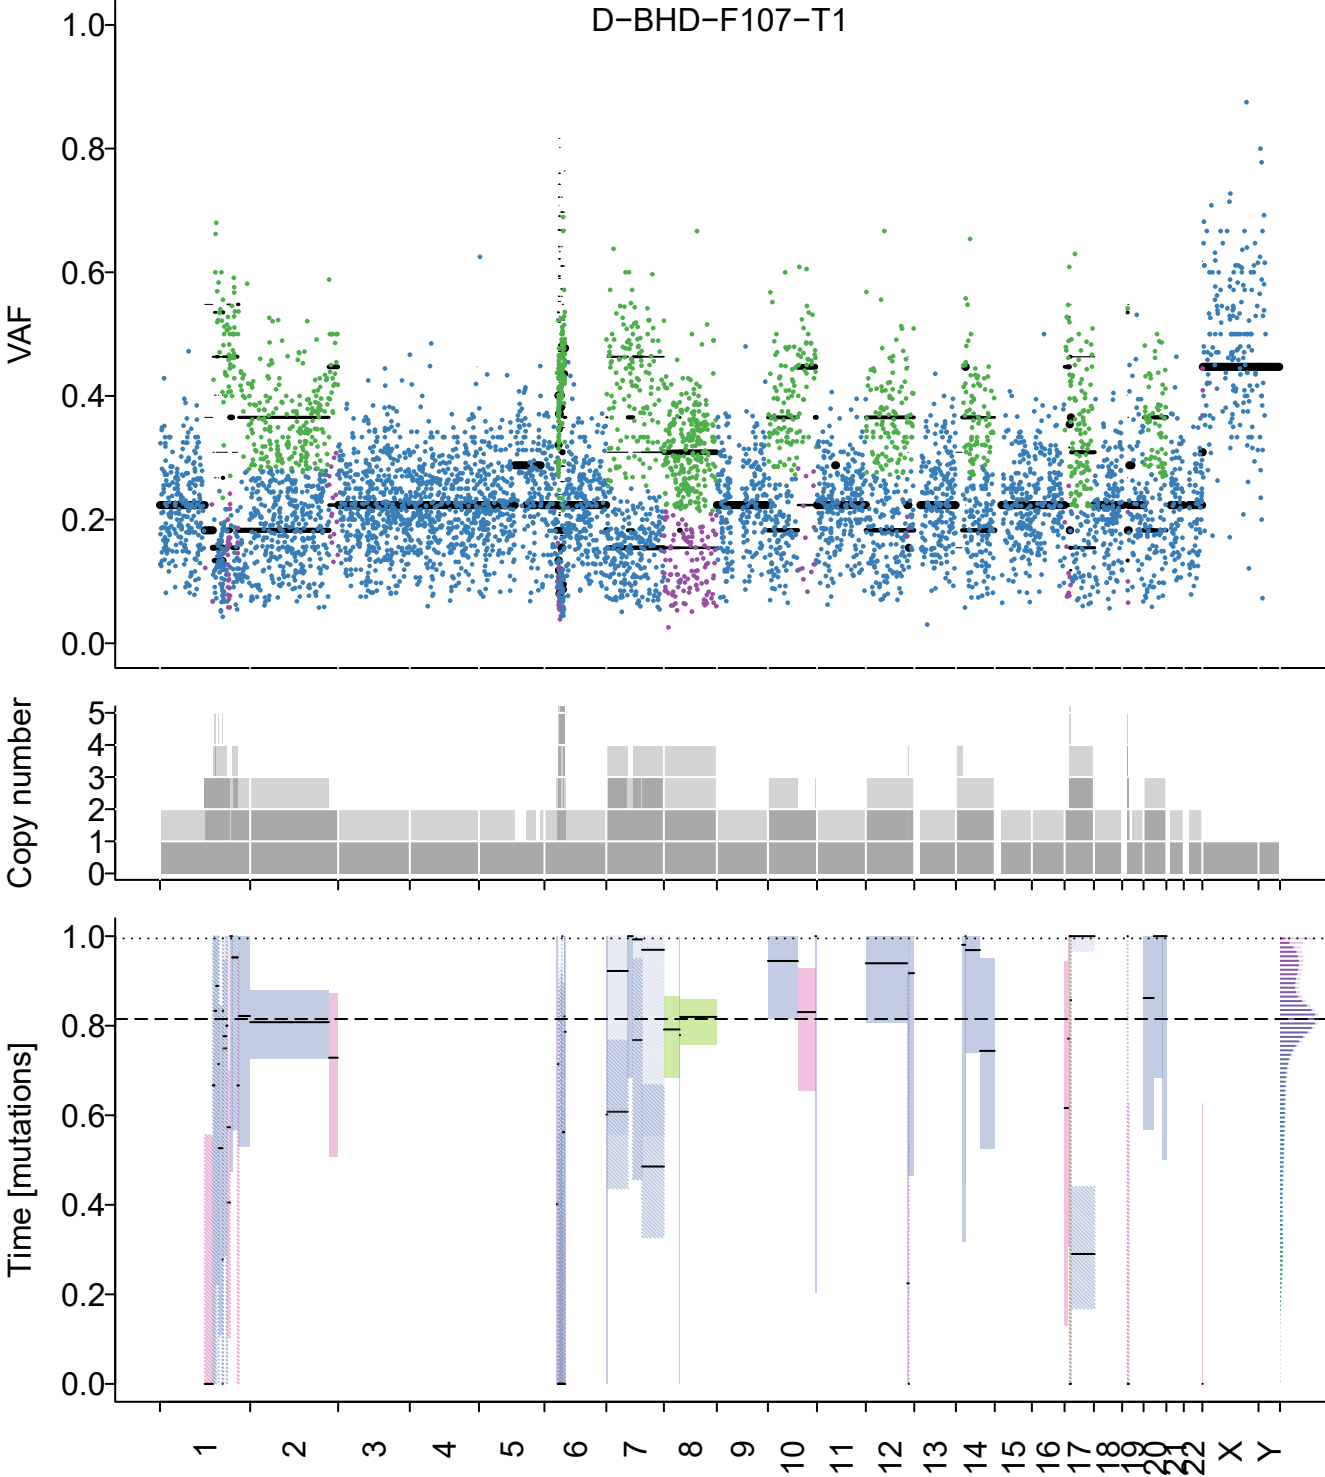

# D-BHD-F123-TR1

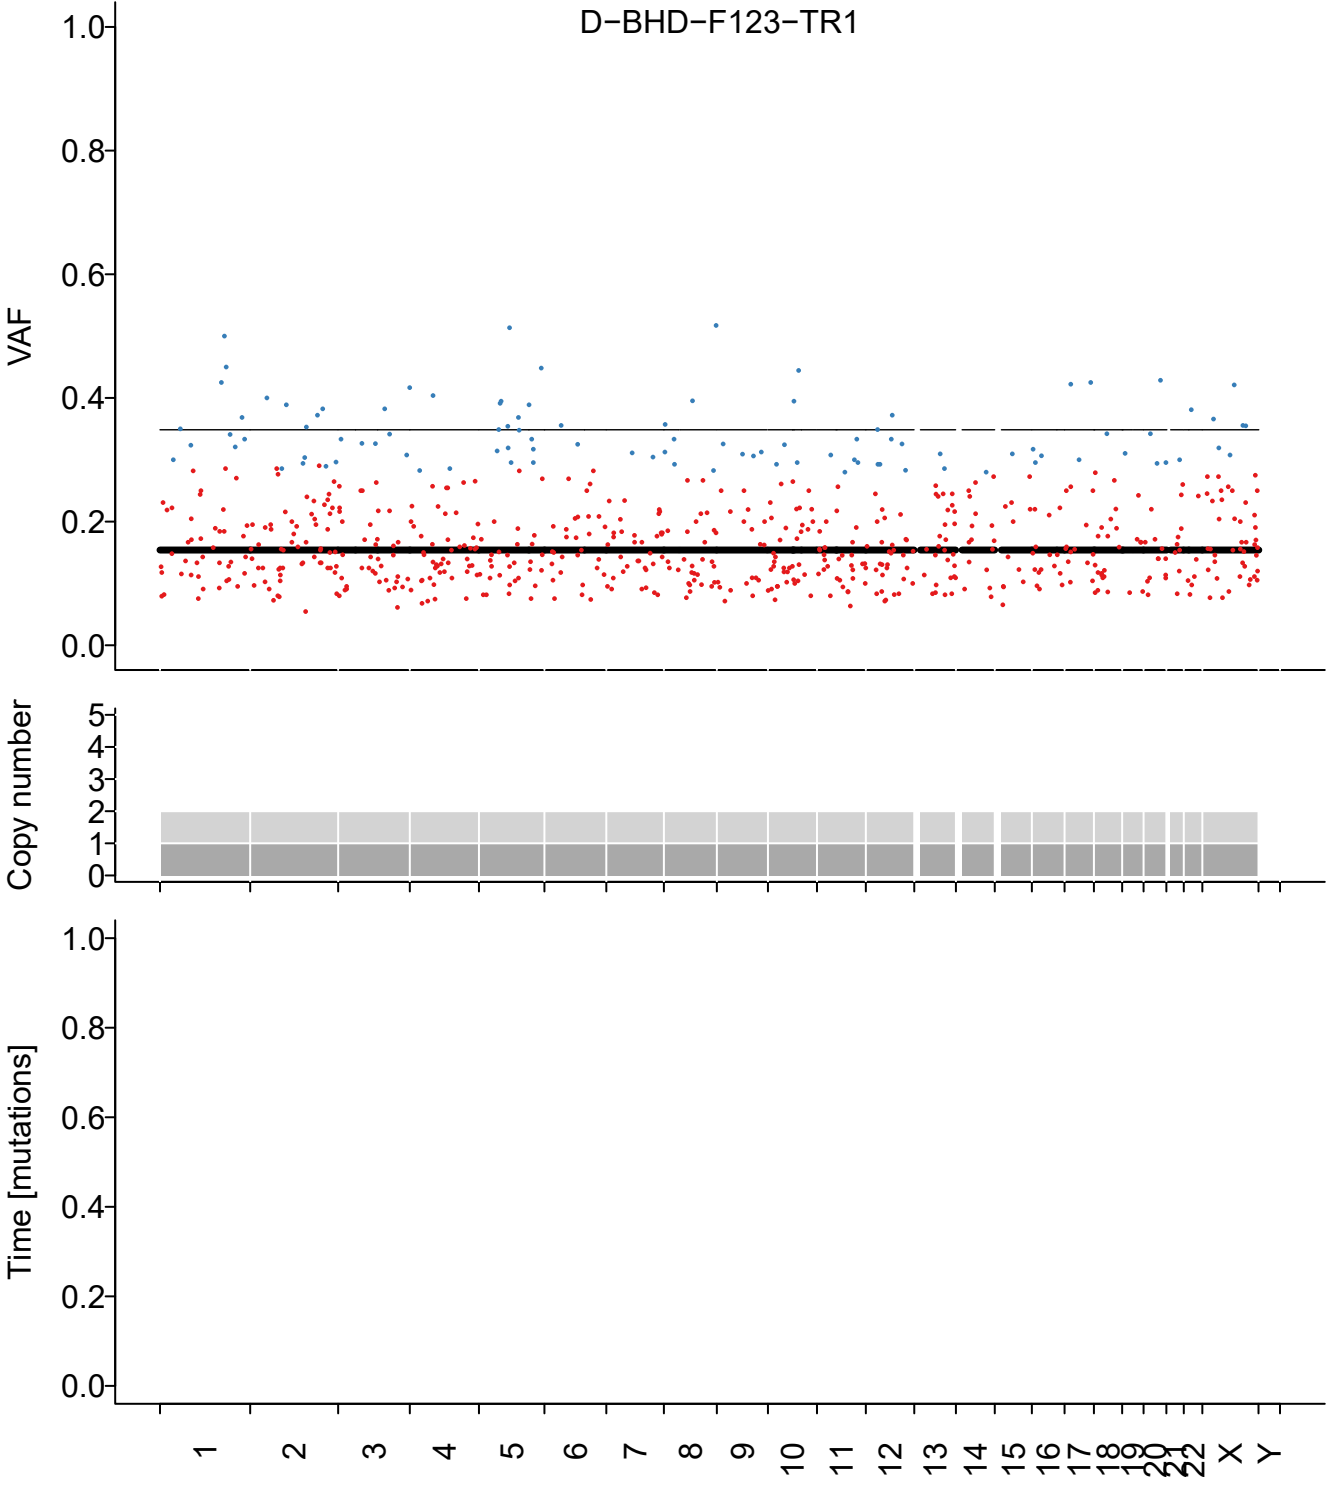

## D-BHD-F124-T1

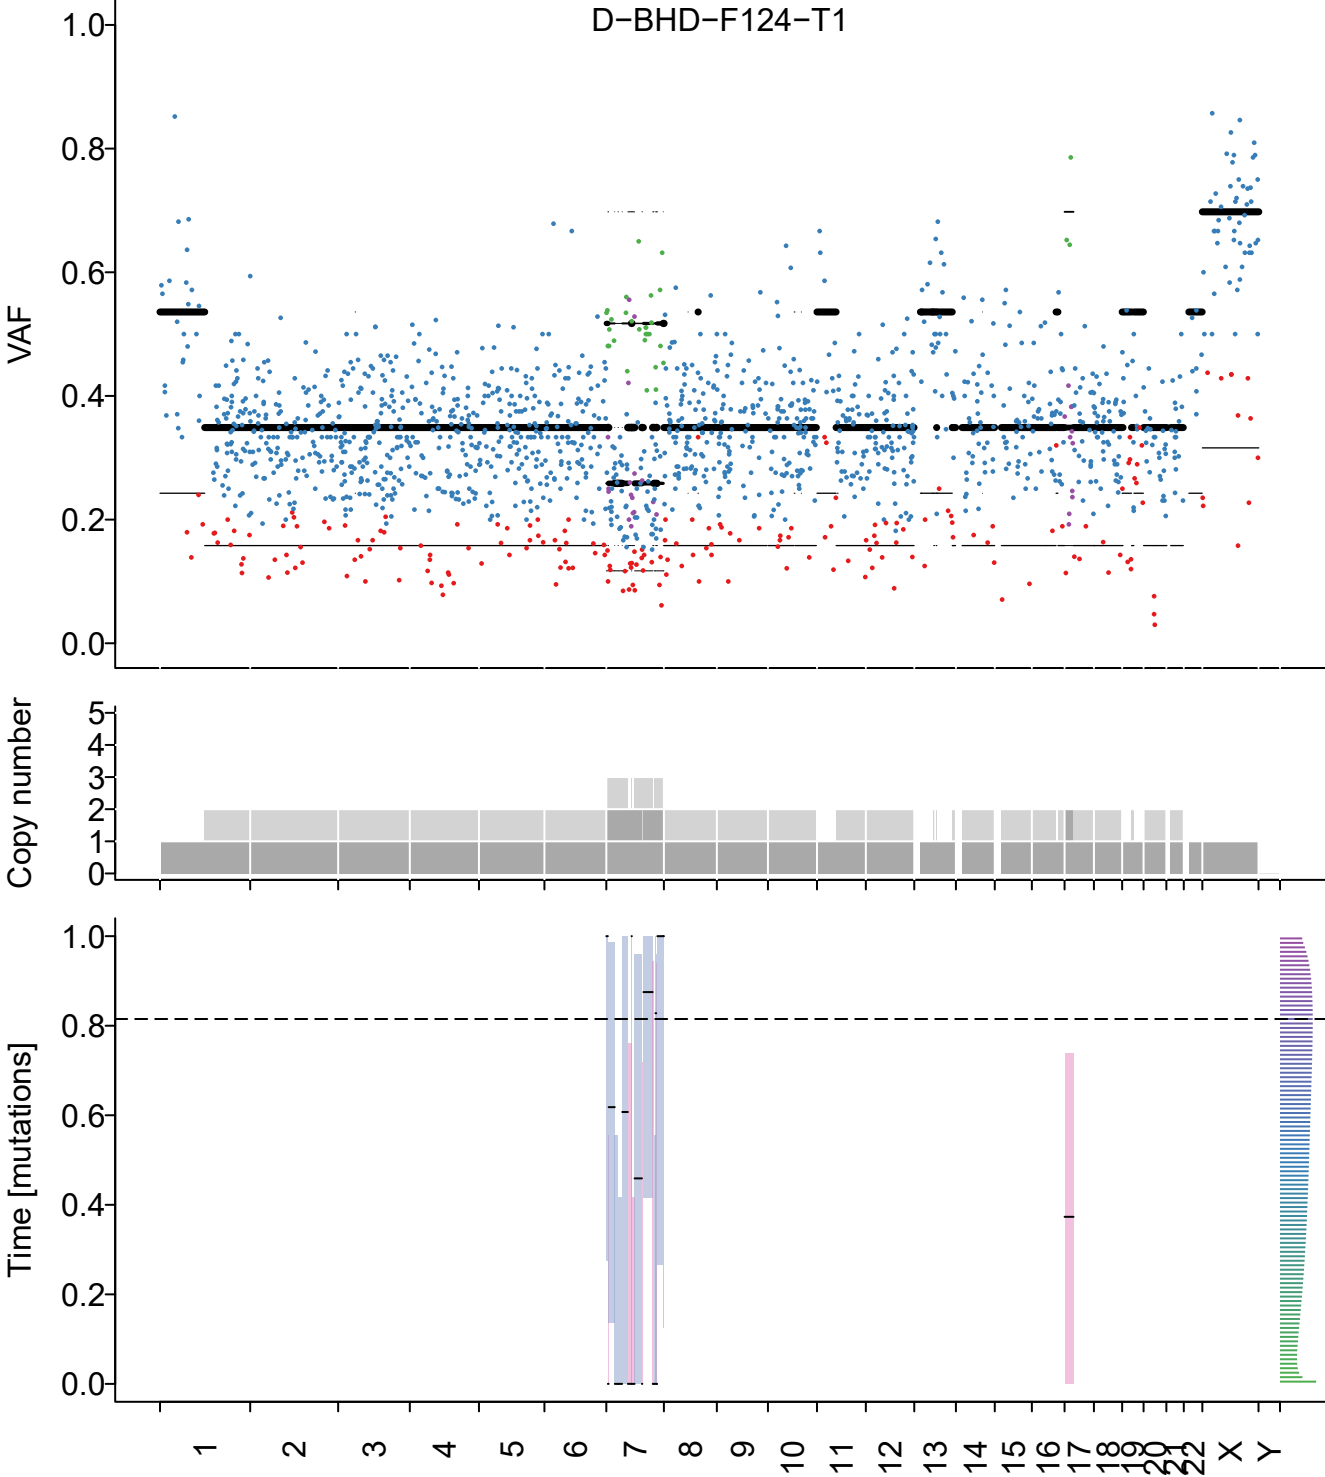

# D-BHD-F133-T1

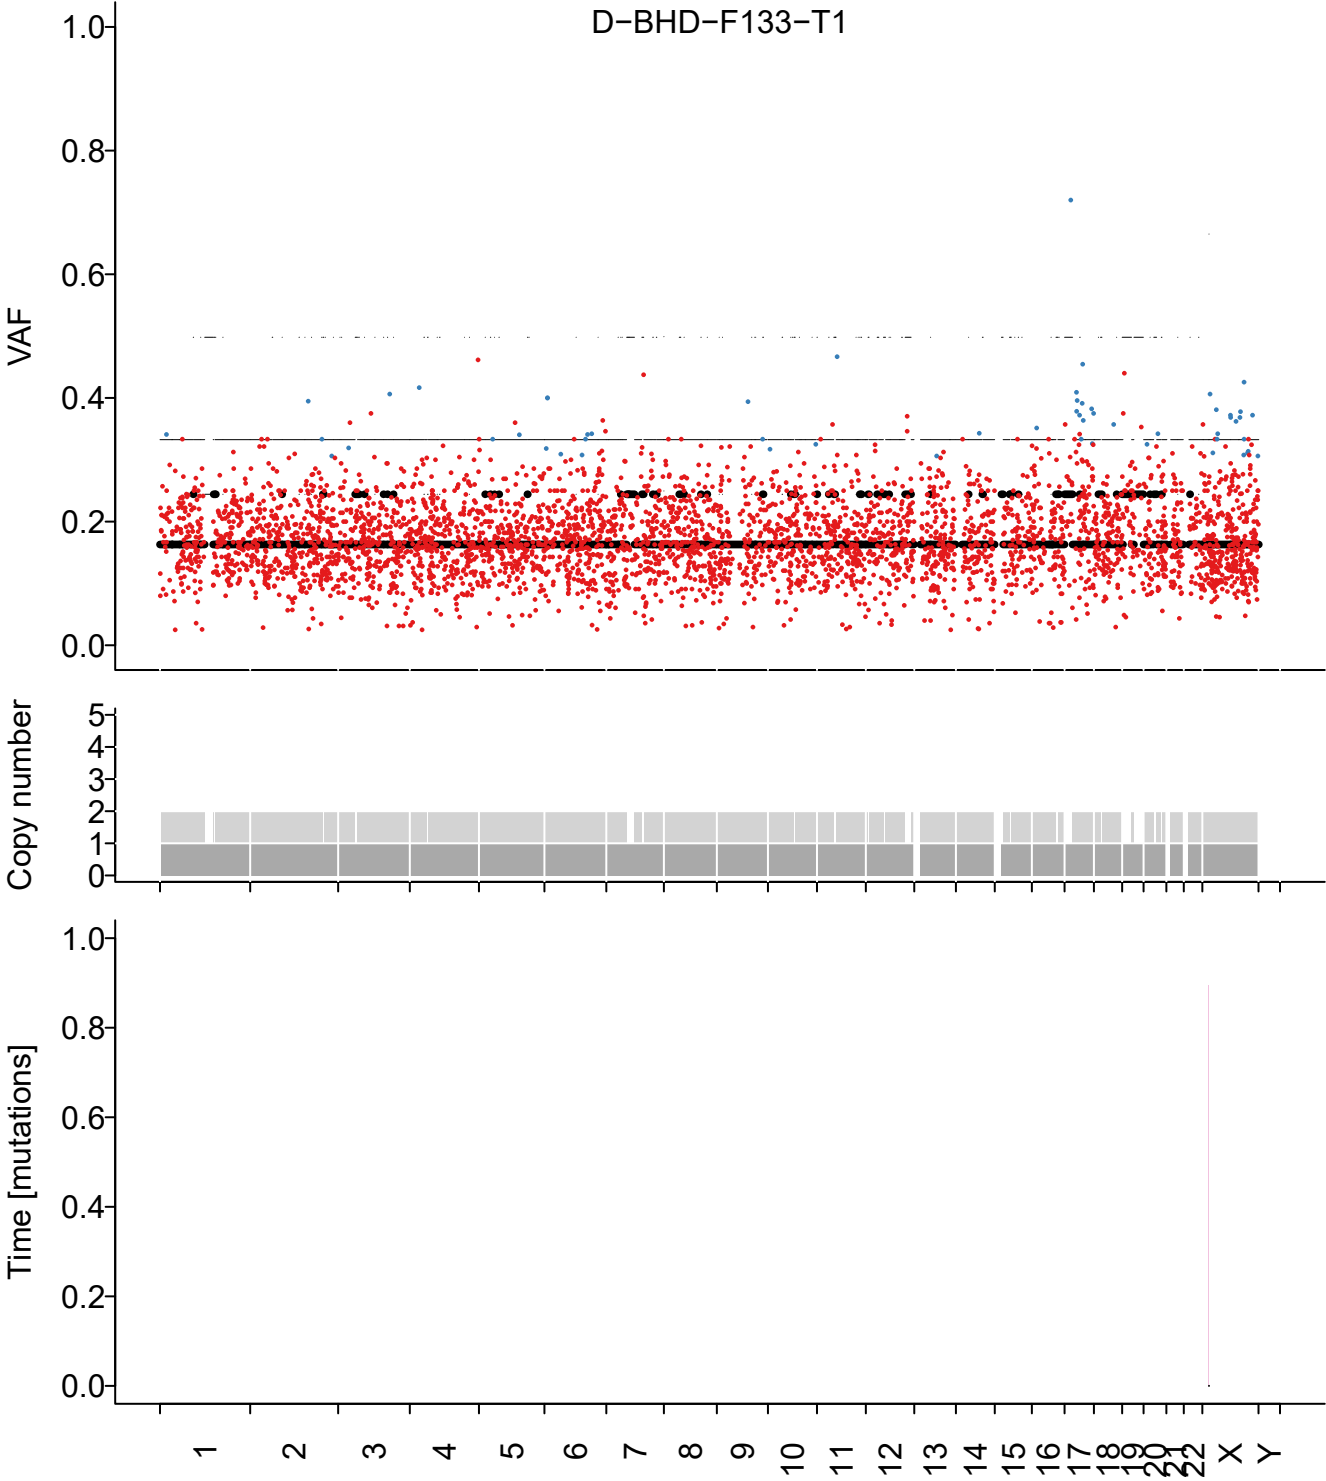

## D-BHD-F133-T2

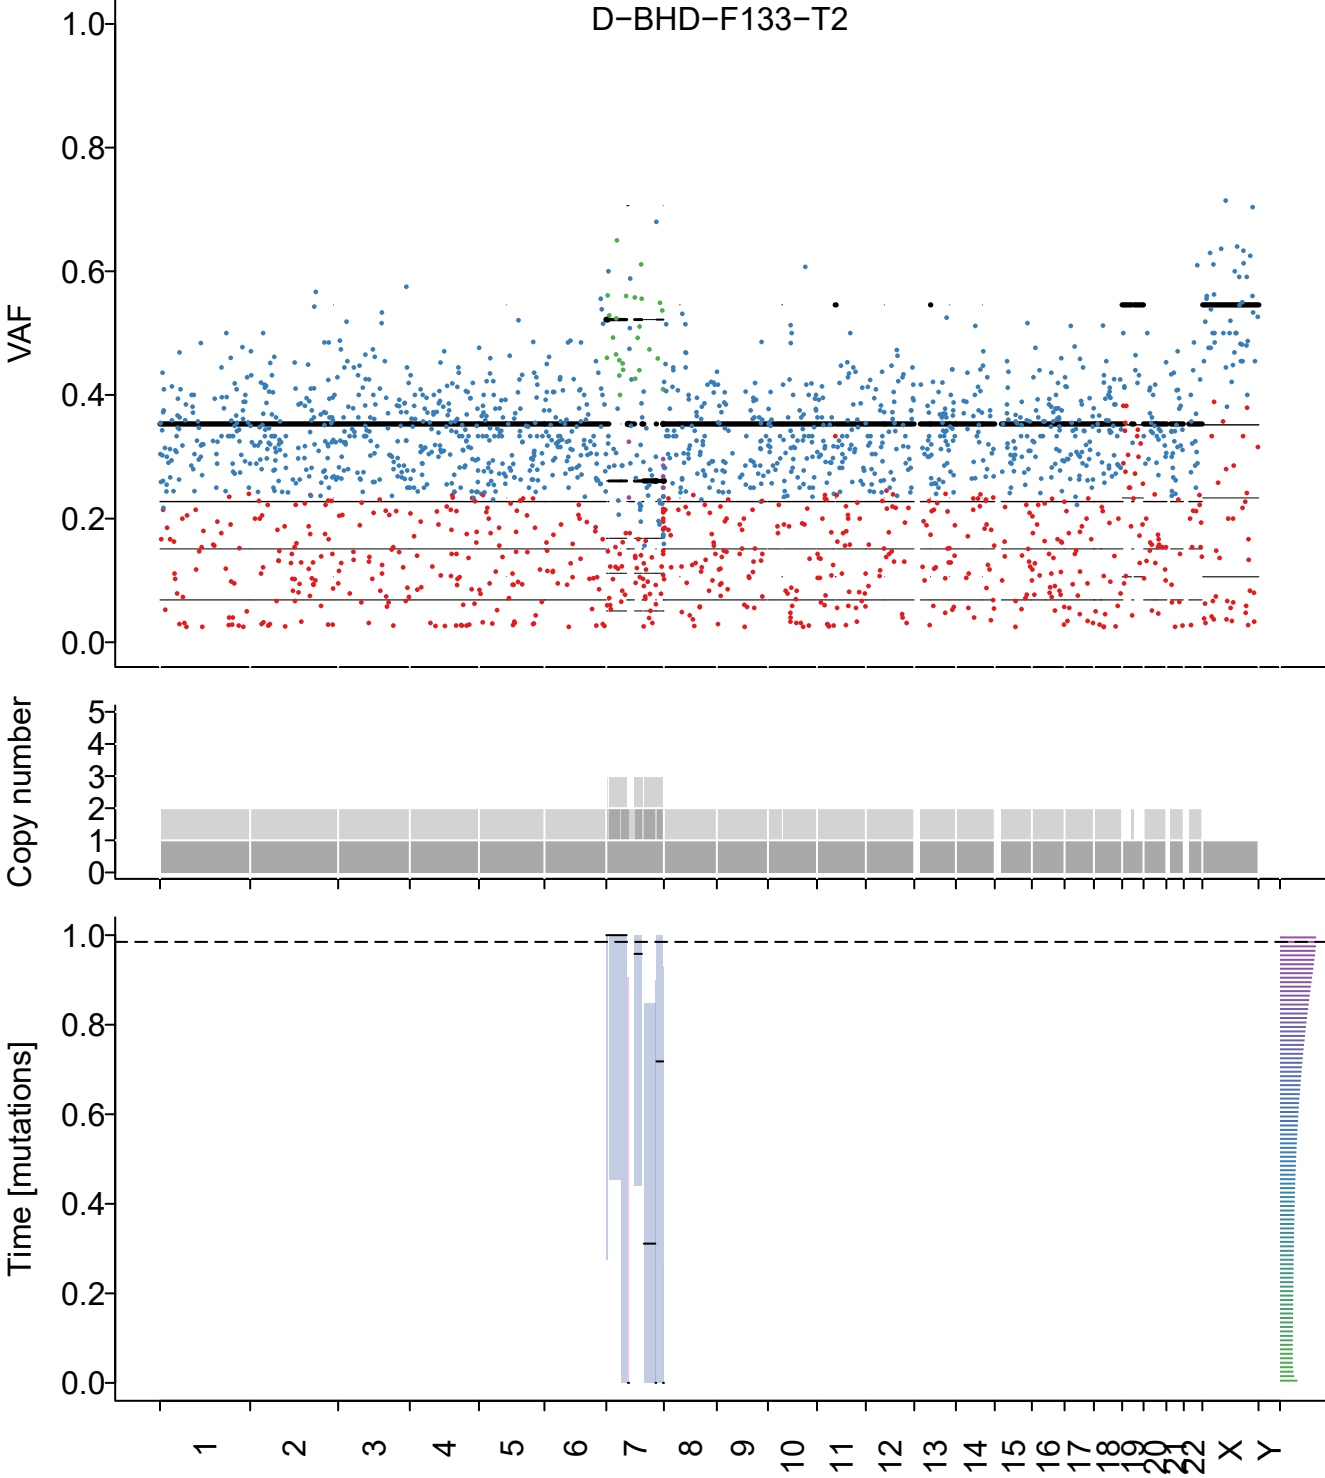

# D-BHD-F135-T2

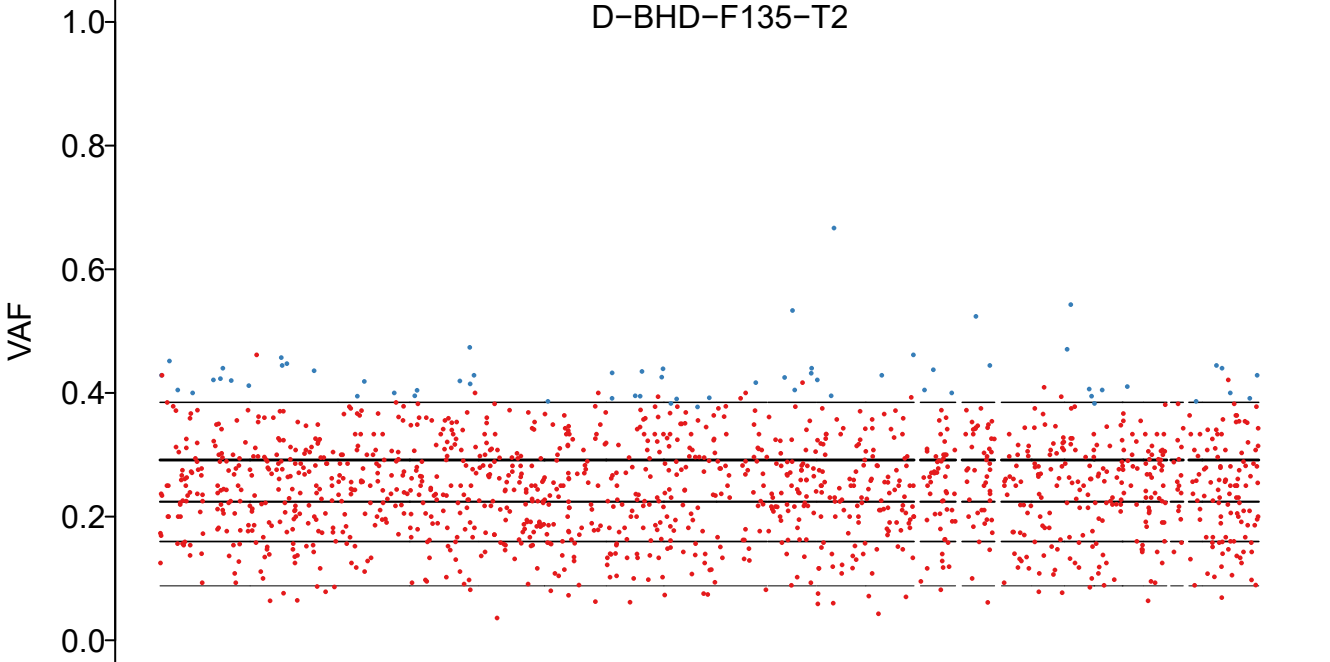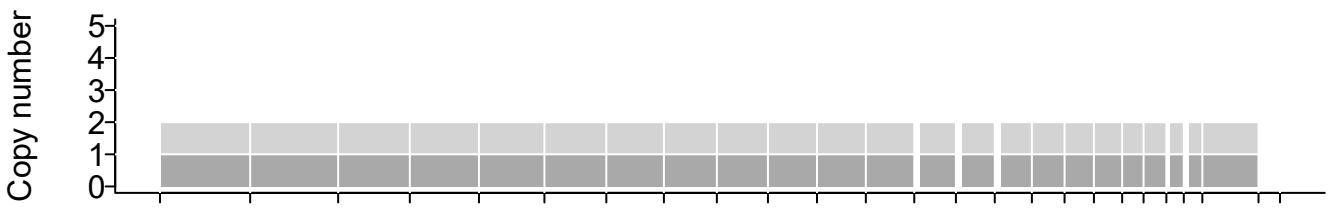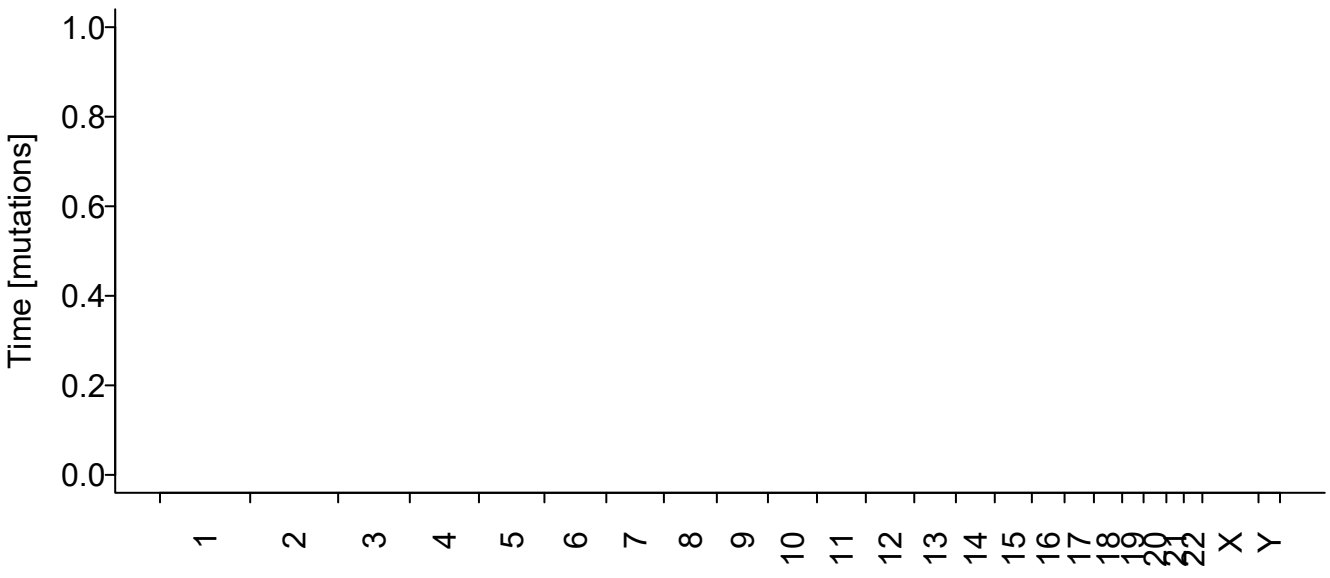

# D-BHD-F192-T1

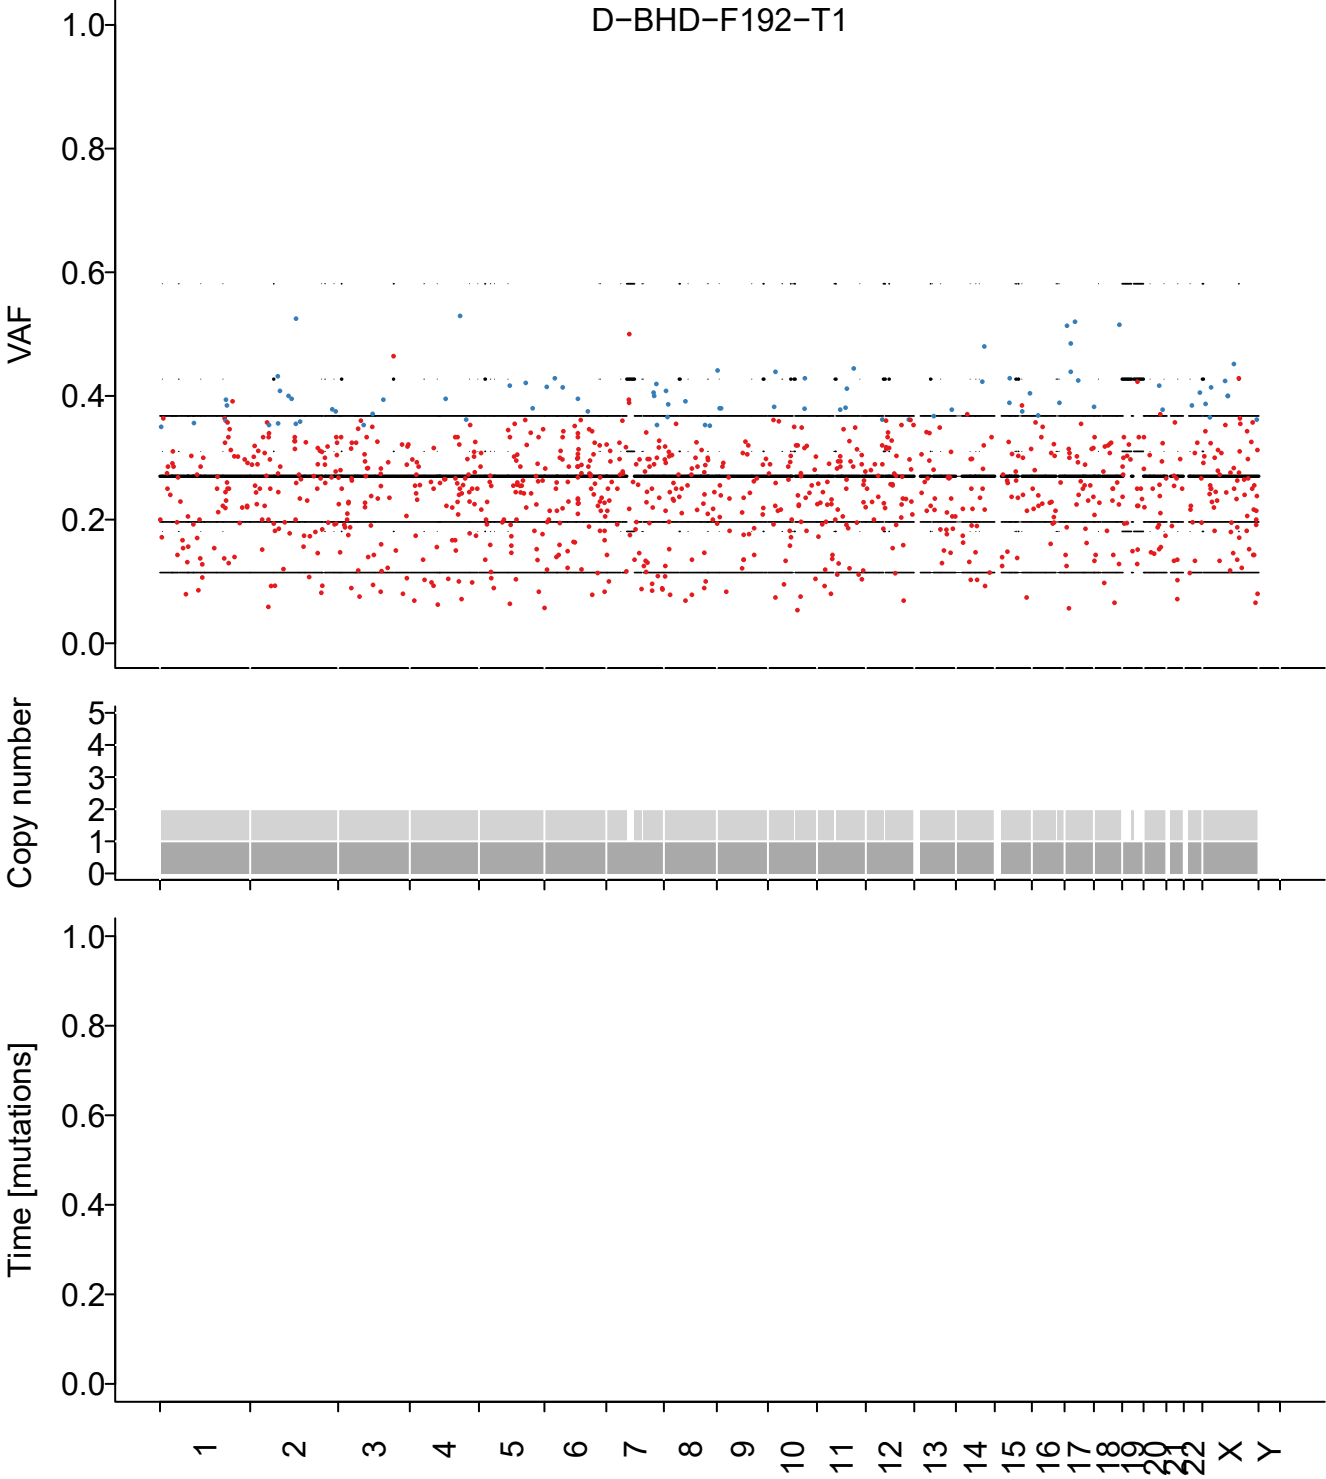

Supplement: mmc12.pdf [file mmc12.pdf]
