# Supplementary material for: Comparative analyses define differences between BHD-associated renal tumour and sporadic chromophobe renal cell carcinoma
Source: PubMed Central journal article supplement (PMC10200853; doi:10.1016/j.ebiom.2023.104596), 2023-05-12

Supplementary Figure 1

a

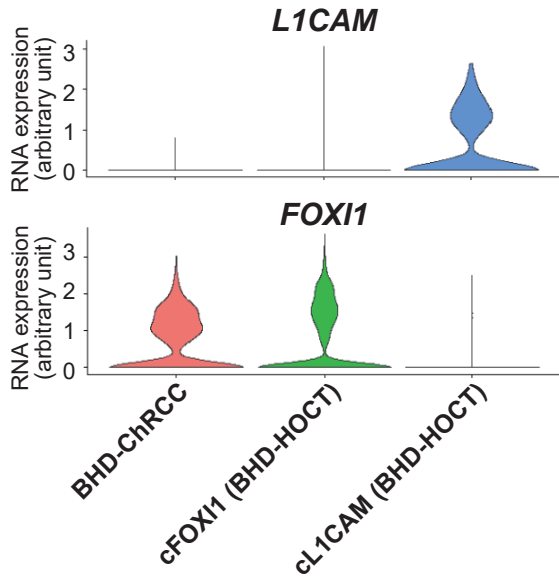

b

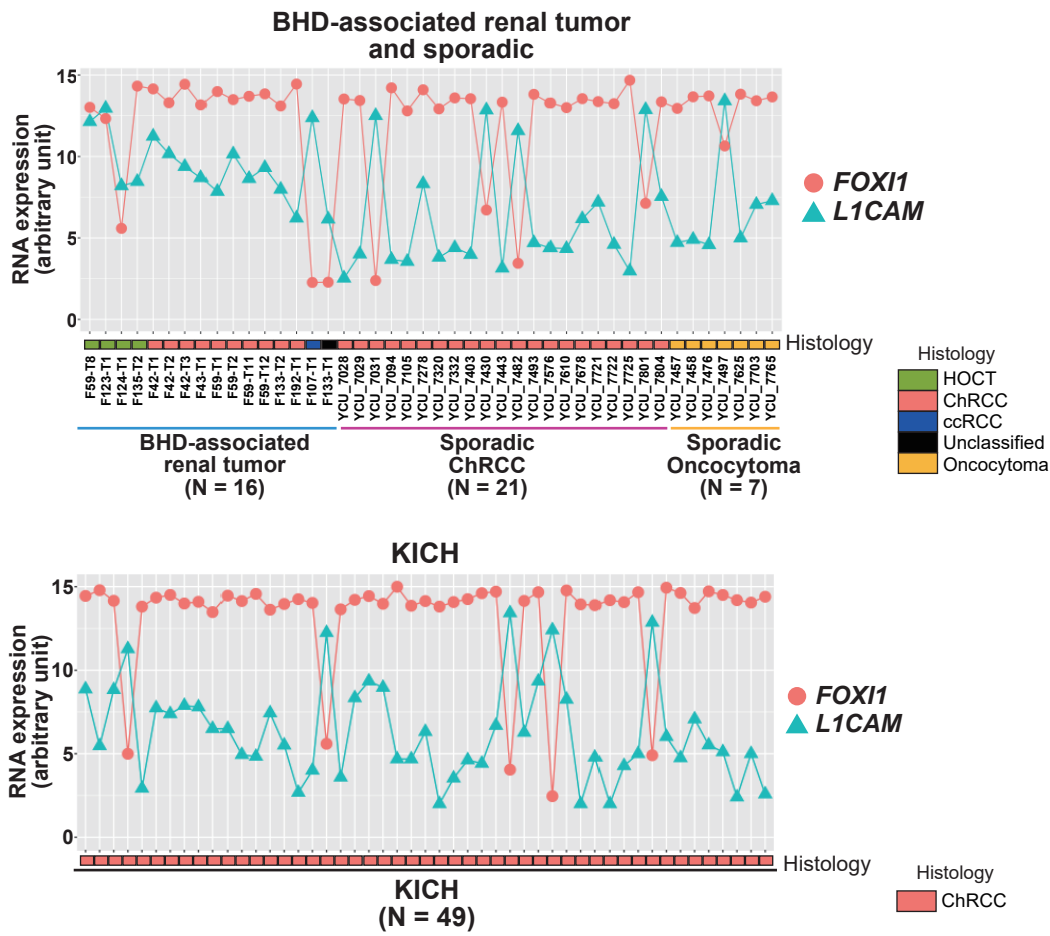

Supplement: mmc8.pdf [file mmc8.pdf]
