# Supplementary material for: Comparative analyses define differences between BHD-associated renal tumour and sporadic chromophobe renal cell carcinoma
Source: PubMed Central journal article supplement (PMC10200853; doi:10.1016/j.ebiom.2023.104596), 2023-05-12

# Supplementary Figure 2

a

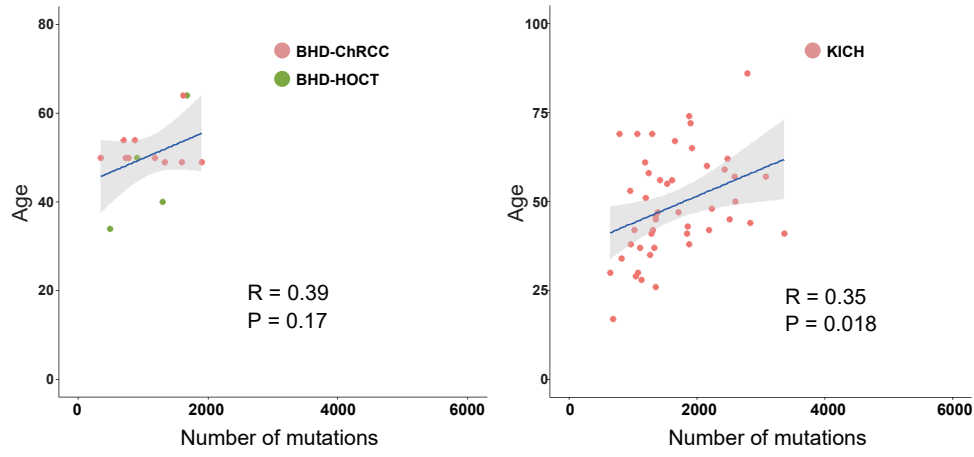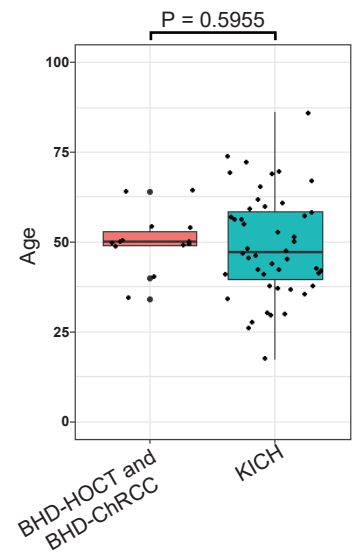

b

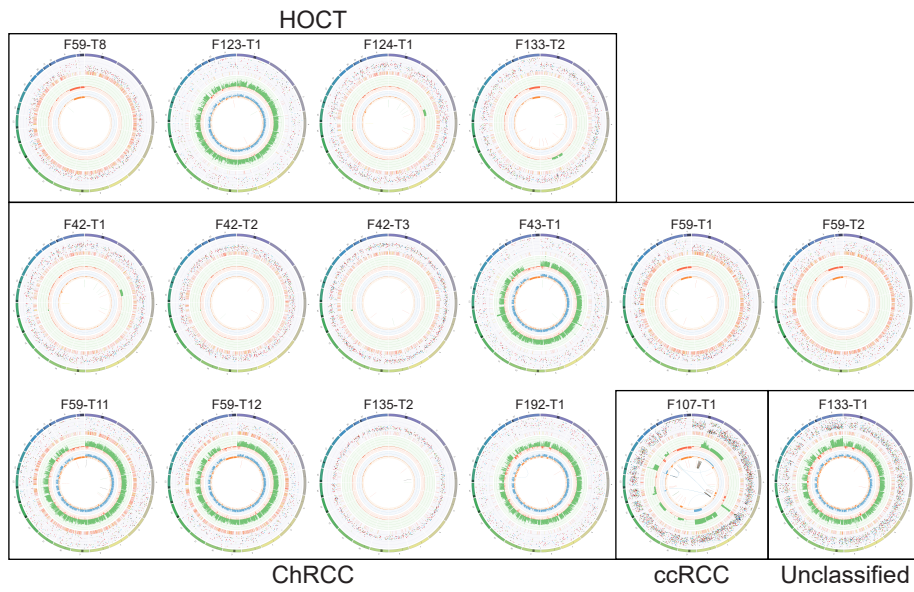

c

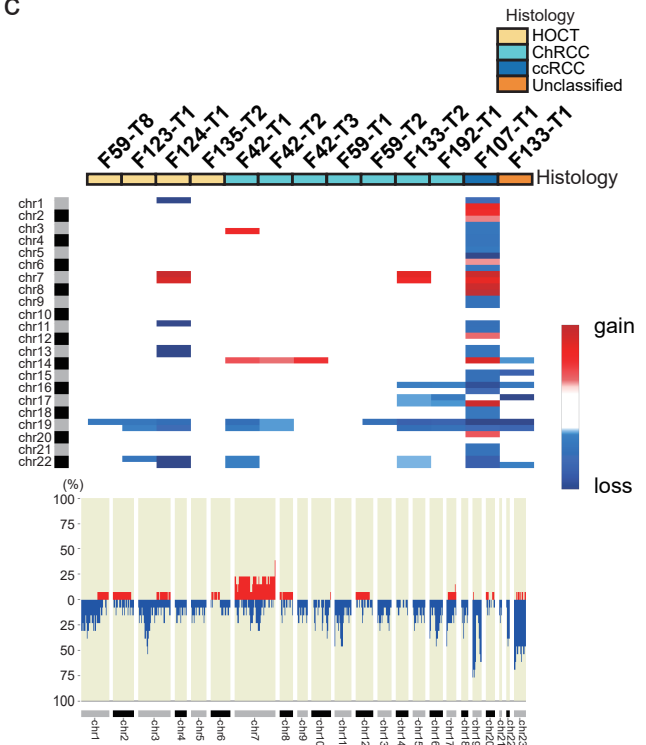

Supplement: mmc9.pdf [file mmc9.pdf]
