# Supplementary material for: Comparative analyses define differences between BHD-associated renal tumour and sporadic chromophobe renal cell carcinoma
Source: PubMed Central journal article supplement (PMC10200853; doi:10.1016/j.ebiom.2023.104596), 2023-05-12

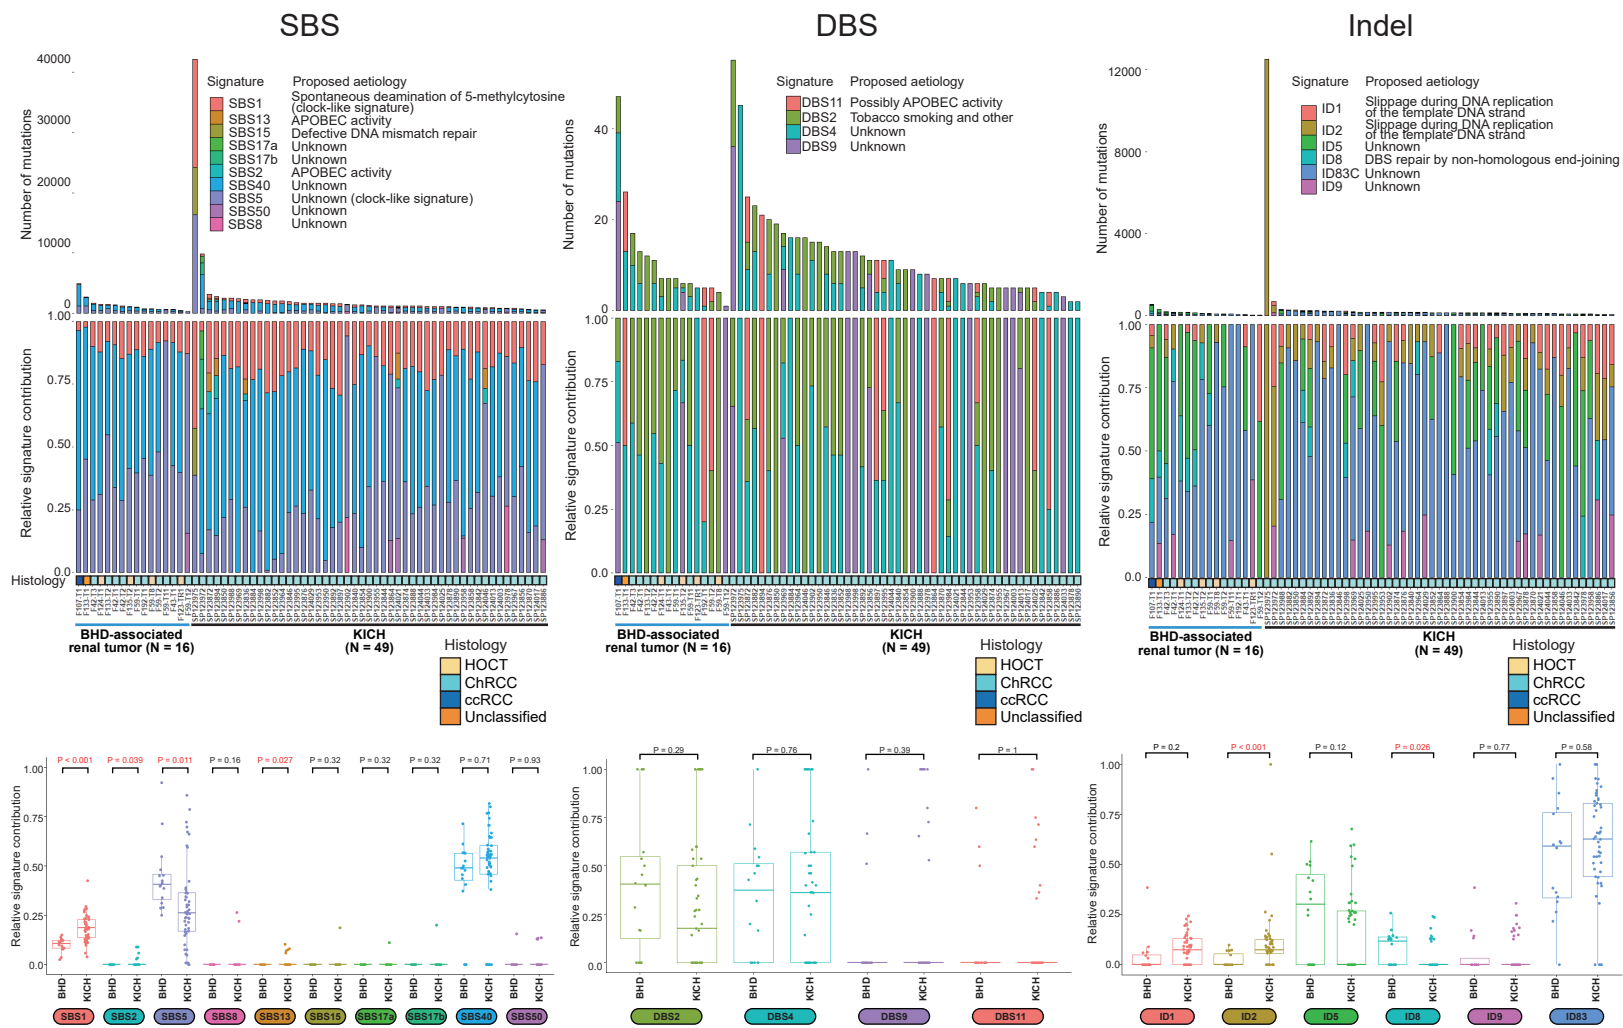

Supplement: mmc10.pdf [file mmc10.pdf]
